# Supplementary material
Source: PubMed Central journal article supplement (PMC3033283)
Supplement: 1019059108_pnas.201019059SI.pdf [file 1019059108_pnas.201019059SI.pdf]

# Supporting Information

Jiang et al. 10.1073/pnas.1019059108

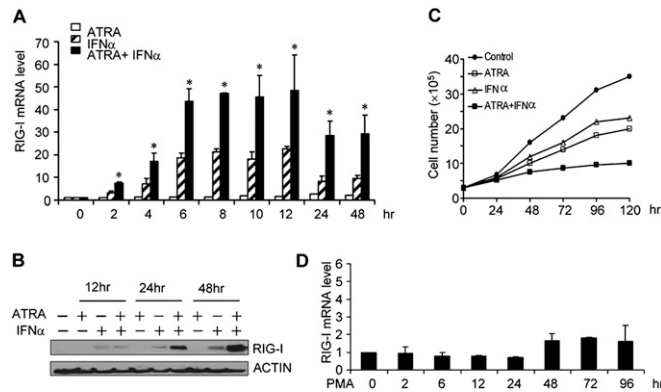

**Fig. S1.** ATRA and IFN- $\alpha$  synergistically induce RIG-I expression and inhibit cell proliferation in U937 cells. (A and C) U937 cells were treated with 1  $\mu$ M ATRA and/or 1,000 U/mL IFN- $\alpha$  for different time courses. RIG-I mRNA level (A) and protein level (B) were measured by real-time PCR ( $n = 3$ , mean  $\pm$  SD, RA + IFN- $\alpha$  group vs. IFN- $\alpha$  group; \* $P < 0.05$ ) and Western blotting assays, respectively. (C) Cell numbers were counted at the indicated time points after the treatments. (D) U937 cells were treated with 1 nM phorbol 12-myristate 13-acetate (PMA) for the different time points as indicated, and RIG-I mRNA level was measured by real-time PCR ( $n = 3$ , mean  $\pm$  SD).

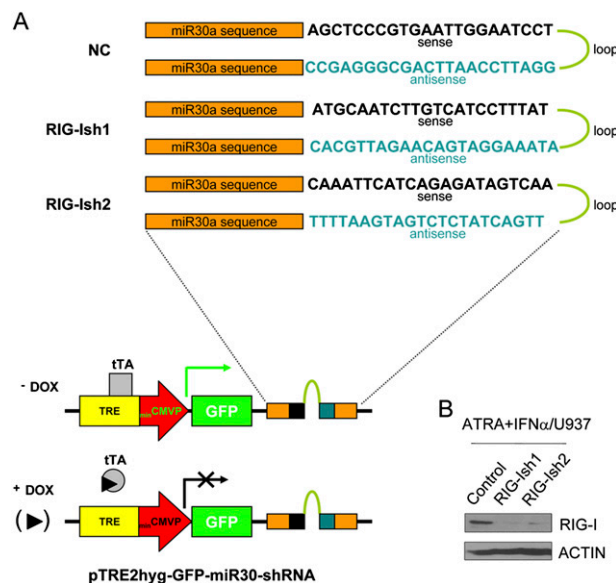

**Fig. S2.** Establishment of RIG-I knockdown U937 cell lines. (A) (Upper) Core shRNA sequences are listed. The core shRNA sequences and the flanked miR30a sequences are inserted into the 3' UTR of a GFP-coding sequence in pTRE2hyg vector. (Lower) Production of GFP-shRNA transcript in host cells is under the control of a tetracycline-controlled transactivator (tTA)-inducible tetracycline-responsive element CMV promoter (TRE-CMVP) regulatory element. (B) After the stimulation with 1  $\mu$ M ATRA plus 1,000 U/mL IFN- $\alpha$ 2b for 48 h, RIG-I protein expression levels in the control or RIG-I knockdown U937 cell lines (RIG-Ish1 and RIG-Ish2) were assessed by Western blotting assay.

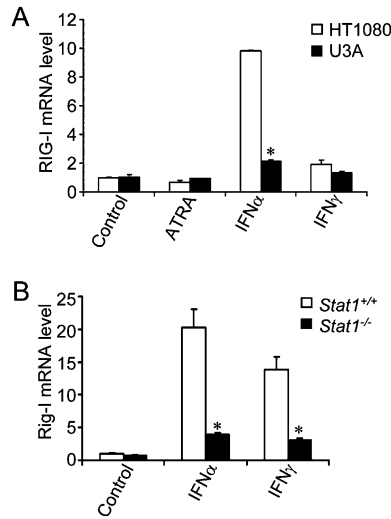

**Fig. S3.** IFN- $\alpha$  stimulates RIG-I expression through STAT1. (A) STAT1 WT HT1080 cells or STAT1-deficient derivative U3A cells (1, 2) were individually treated without or with 1  $\mu$ M ATRA, 1,000 U/mL IFN- $\alpha$ , or 1,000 U/mL IFN- $\gamma$  for 12 h. The mRNA levels of RIG-I were determined by real-time PCR assay ( $n = 3$ , mean  $\pm$  SD; \* $P < 0.05$ ). (B) BM myeloid cells from Stat1 WT or knockout mice were treated with 1,000 U/mL IFN- $\alpha$  or 30 ng/mL IFN- $\gamma$  for 2 h, and the RIG-I mRNA levels were then measured by real-time PCR assay ( $n = 3$ , mean  $\pm$  SD; \* $P < 0.05$ ).

- DeVries TA, Kalkofen RL, Matassa AA, Reyland ME (2004) Protein kinase Cdelta regulates apoptosis via activation of STAT1. *J Biol Chem* 279:45603–45612.
- Müller M, et al. (1993) Complementation of a mutant cell line: Central role of the 91 kDa polypeptide of ISGF3 in the interferon-alpha and -gamma signal transduction pathways. *EMBO J* 12:4221–4228.

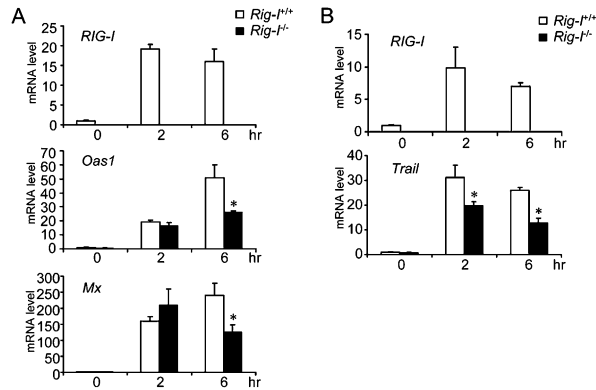

**Fig. S4.** ISG induction during the early phase is impaired by RIG-I deficiency. Primary RIG-I<sup>+/+</sup> or RIG-I<sup>-/-</sup> BM myeloid cells were stimulated by 1,000 U/mL IFN- $\alpha$  (A) or 30 ng/mL IFN- $\gamma$  (B) for different time points as indicated. Relative mRNA levels of various ISGs were measured by real-time PCR assay ( $n = 3$ , mean  $\pm$  SD; \* $P < 0.05$ ).

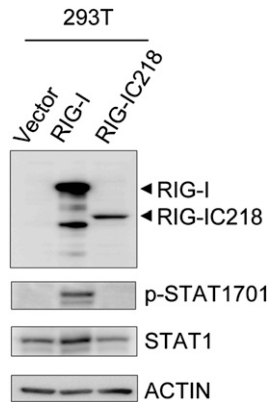

**Fig. S5.** STAT1 activation by RIG-I induction requires caspase recruitment domains (CARDs). RIG-IC218-expressing plasmid, which encodes a RIG-I mutant ranging from amino acids 218–925 of the WT RIG-I (with the deletion of the N-terminal CARDs), is transiently transfected into 293T, in parallel with the transfection of a full-length RIG-I-encoding plasmid. After 48 h, the tyrosine-phosphorylated and total levels of STAT1 were examined by Western blotting assay.

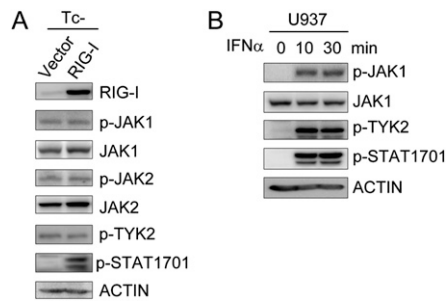

**Fig. S6.** RIG-I induction does not promote the activation of JAK family members. (A) U937/vector and U937/RIG-I cells were cultured in the Tc<sup>-</sup> medium for 6 d, and the cell protein extracts were detected by Western blotting analysis for phosphorylated levels of JAK1, JAK2, and TYK2. (B) U937 cells were treated with 1,000 U/mL IFN- $\alpha$  for the indicated time points, and the cell lysates were analyzed by Western blotting assay.

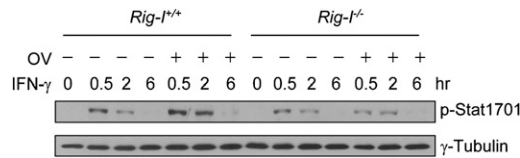

**Fig. S7.** Phosphatase inhibitor treatment fails to rescue the hypophosphorylated status of Stat1 in *Rig-I*<sup>-/-</sup> myeloid cells. *Rig-I*<sup>+/+</sup> and *Rig-I*<sup>-/-</sup> BM myeloid cells were treated with 30 ng/mL IFN- $\gamma$ , with or without 0.1 mM sodium orthovanadate (OV), for different time points as indicated. Cells were then collected for protein extracts and detected by Western blotting analysis for tyrosine 701-phosphorylated Stat1.

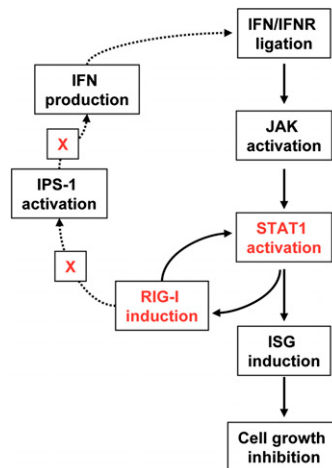

**Fig. S8.** Diagram depicts an amplifying role of RIG-I induction on STAT1 activation. Within the canonical IFN signaling pathway, IFN ligands bind to their receptors on the membrane and the activated JAK family kinases trigger the phosphorylation/activation of STAT1, which, in turn, induces the expression of numerous ISGs, including RIG-I. Our data indicate that RIG-I induction exerts a positive feedback effect on STAT1 activation, which critically amplifies ISG expression and cellular growth-inhibiting effect. In addition, RIG-I induction triggers STAT1 activation via a mechanism independent of further stimulating IPS-1 or JAKs, indicating the existence of a noncanonical STAT1 activation pathway through which RIG-I induction acts.

**Table S1.** siRNA sequences for the indicated genes

| Knockdown constructs | Target sequences(5'-3') |
|----------------------|-------------------------|
| RIG-Ish1             | TGCAATCTTGTCATCCTTTAT   |
| RIG-Ish2             | AAATTCATCAGAGATAGTCAA   |
| IPS-1sh1             | CCTGGTGCAAGTGCCTTCTAAT  |
| IPS-1sh2             | GGCAGGTCAGTTAACAATTTA   |
| STAT1sh1             | GCAAGCGTAATCTTCAGGATA   |
| STAT1sh2             | CCTGAAGTATCTGTATCCAAA   |
| NC                   | GCTCCCGTGAATTGGAATCCT   |

NC, negative control.

**Table S2. Primers used for real-time PCR assays**

| Genes              | Forward primers (5'-3')    | Reverse primers (5'-3')   |
|--------------------|----------------------------|---------------------------|
| Human RIG-I        | GGACGTGGCAAAACAAATCAG      | GCAATGTCAATGCCTTCATCA     |
| Human STAT1        | ACCGCACCTTCAGTCTTTCC       | TGAACTGGACCCCTGTCTTCA     |
| Human TRAIL        | GAAGCAACACATTGTCTTCTCAA    | TGATGATTCCCAGGAGTTTATTTTG |
| Human KLF4         | TCCCGCCGCTCCATTAC          | CGATCGTCTTCCCCTCTTTG      |
| Human OAS1         | CTCATCCGCCTAGTCAAGCACT     | CAAGCATAGACCGTCAGGAGCT    |
| Human IFN- $\beta$ | CAGCAATTTTCAGTGTCAGAAGCT   | TCATCCTGTCCTTGAGGCAGTA    |
| Human PKR          | AGCAAAACAATTGGCCGC         | AGCGAGTGTGCTGGTCACTAA     |
| Mouse Rig-I        | GGACGTGGCAAAACAAATCAG      | GCAATGTCAATGCCTTCATCA     |
| Mouse Icsbp        | GCCATACAAAGTTTACCGAATTGTTT | TCACGCAGCCAGCAGTTG        |
| Mouse Trail        | GAAGCAACACATTGTCTTCTCAA    | TGATGATTCCCAGGAGTTTATTTTG |
| Mouse Klf4         | TCCCGCCGCTCCATTAC          | CGATCGTCTTCCCCTCTTTG      |
| Mouse Oas1         | GCCTGGTCACGCACTGGTA        | AAGCCCTGGGCTGTGTTG        |
| Mouse Pkr          | GCTGCGAAAGAAGCCTATCAGA     | TGCTGAAAAGCCACTGAATG      |
| Mouse Mx           | TCCCAGACCTGACTCTCATTGA     | GGTTGATGGTCTCTTGTTTTGG    |
| 18s                | CGCGTTCTATTTTGTGGTTT       | TTCGCTCTGGTCCGCTTG        |
